# Supplementary material for: Controllable electronic and magnetic properties in a two-dimensional germanene heterostructure
Source: Royal Society of Chemistry journal article supplement (doi:10.1039/c6cp00108d), 2016-01-01
Supplement: c6cp00108d1.pdf [file c6cp00108d1.pdf]

## Supplementary Information for:

### Controllable Electronic and Magnetic Properties in Two-dimensional Germanene Heterostructure

Run-wu Zhang,<sup>a</sup> Wei-xiao Ji,<sup>a</sup> Chang-wen Zhang\*,<sup>a</sup> Sheng-shi Li,<sup>b</sup> Ping Li,<sup>a</sup> Pei-ji Wang,<sup>a</sup> Feng Li<sup>a</sup>, and Miao-juan Ren<sup>a</sup>

<sup>a</sup>School of Physics and Technology, University of Jinan, Jinan, Shandong, 250022, People's Republic of China

<sup>b</sup>School of Physics, State Key laboratory of Crystal Materials, Shandong University, Jinan, Shandong, 250100, People's Republic of China

\* Correspondence and requests for materials should be addressed to: zhchwsd@163.com

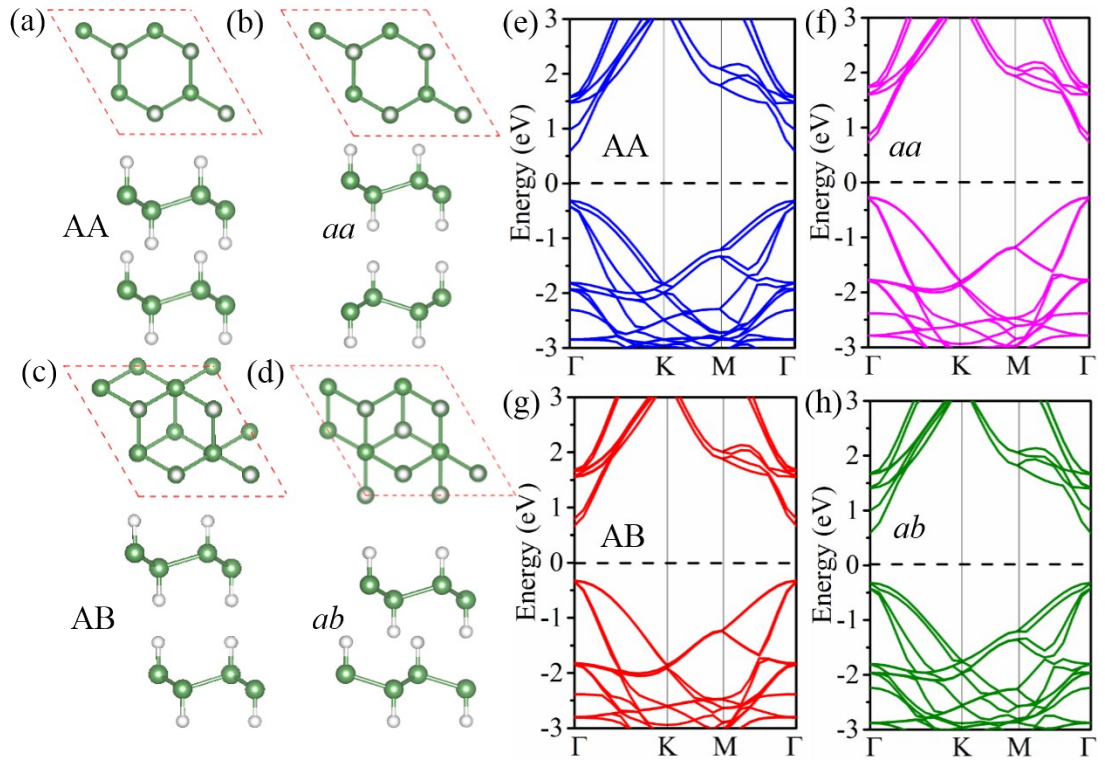

**Fig. S1.** The optimized structures of the germanane HTSs, (a) AA, (b) aa, (c) AB, and (d) ab. The green balls represent Ge atoms and the white balls represent hydrogen atoms. Band structures of the germanane HTSs for patterns with vdW interaction (e) AA, (f) aa, (g) AB, and (h) ab.

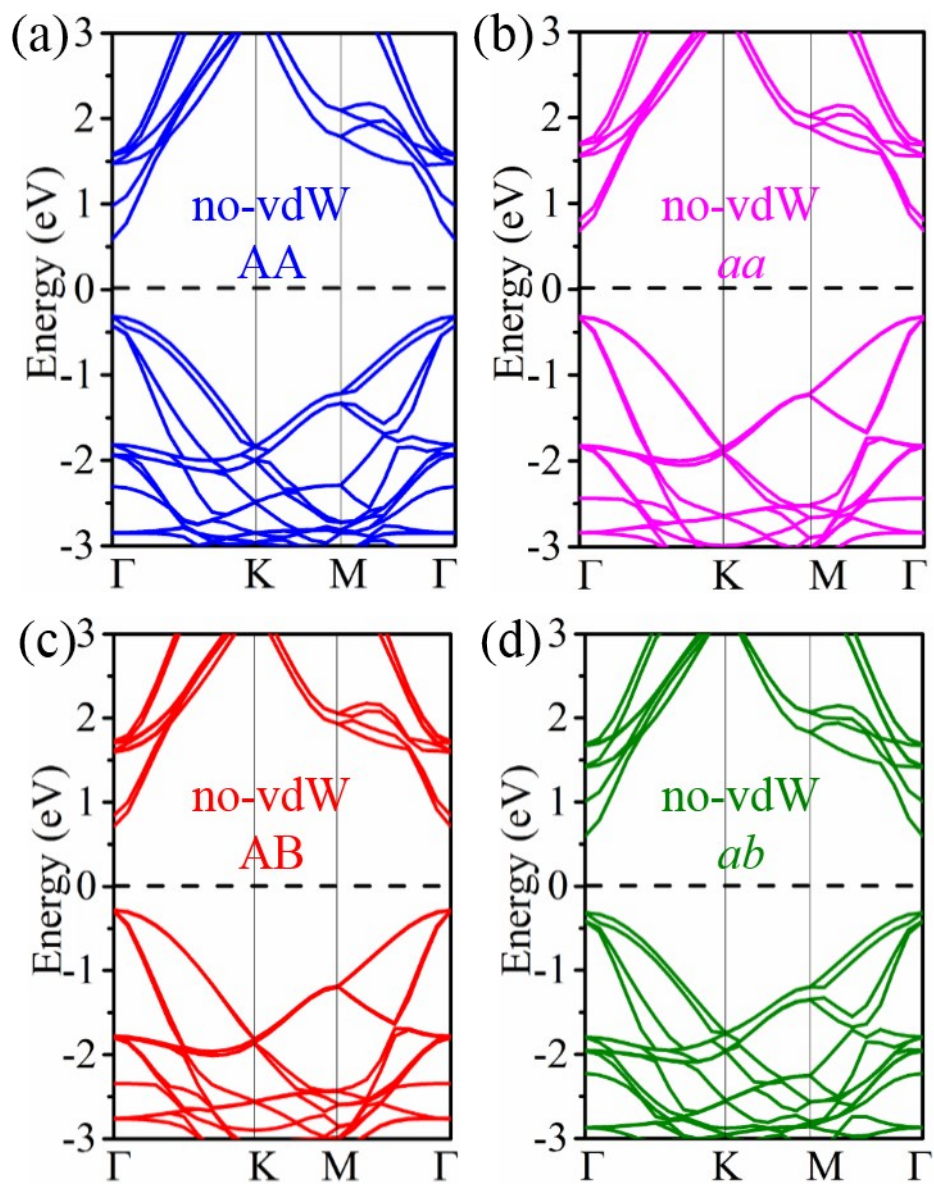

**Fig. S2.** Band structures of the germanane HTSs for patterns with no vdW interaction (a) AA, (b) aa, (c) AB, and (d) ab.
